# Supplementary figures and images for: Tracking subjects’ strategies in behavioural choice experiments at trial resolution
Source: eLife journal article supplement (doi:10.7554/elife.86491), 2024-03-01

a

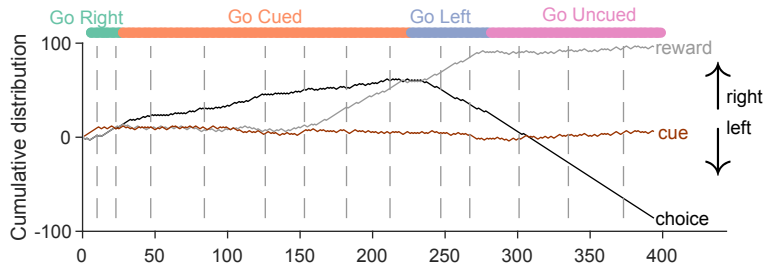

b

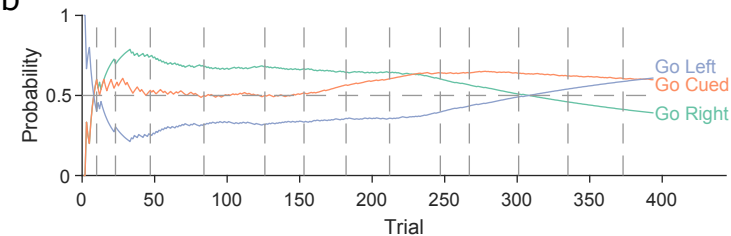

Supplement: supp [file elife_poa_e86491_Figure_1_figure_supplement_1.pdf › elife_poa_e86491_Figure_1_figure_supplement_1.pdf]

**a**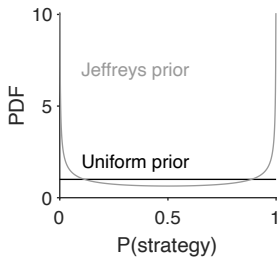**b**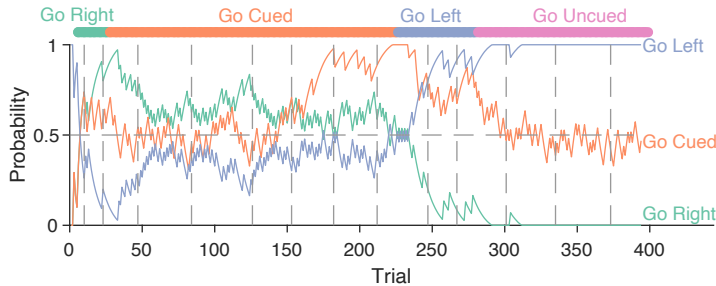**c**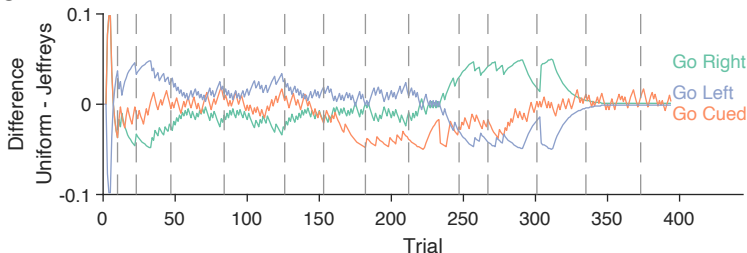

Supplement: supp [file elife_poa_e86491_Figure_1_figure_supplement_2.pdf › elife_poa_e86491_Figure_1_figure_supplement_2.pdf]

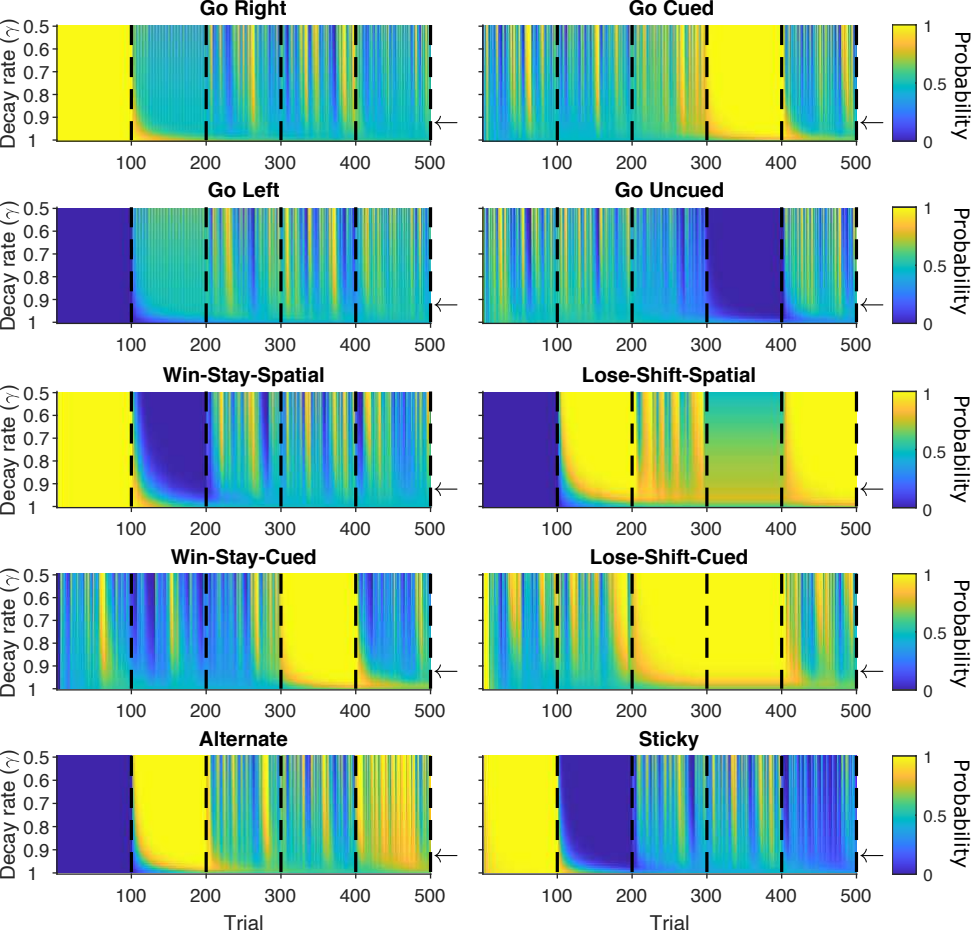

Supplement: supp [file elife_poa_e86491_Figure_2_figure_supplement_1.pdf › elife_poa_e86491_Figure_2_figure_supplement_1.pdf]

**a**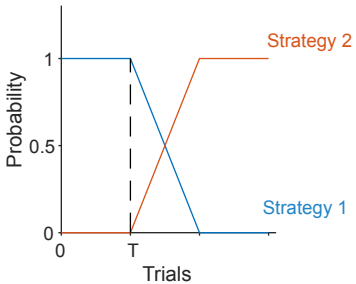**b**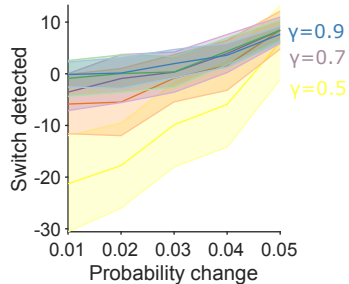**c**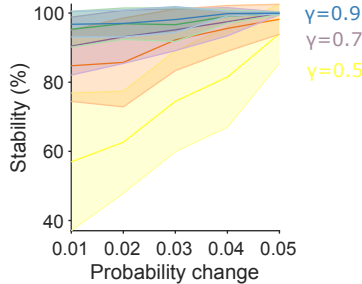

Supplement: supp [file elife_poa_e86491_Figure_2_figure_supplement_2.pdf › elife_poa_e86491_Figure_2_figure_supplement_2.pdf]

**a**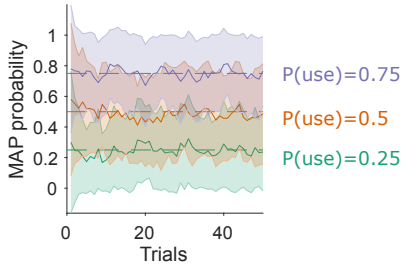**b**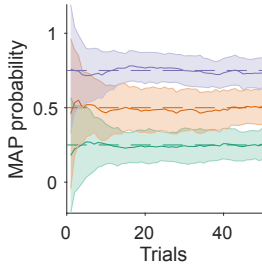**c**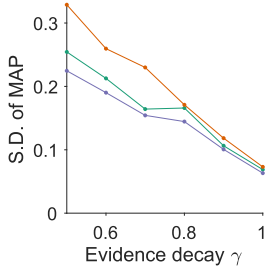

Supplement: supp [file elife_poa_e86491_Figure_2_figure_supplement_3.pdf › elife_poa_e86491_Figure_2_figure_supplement_3.pdf]

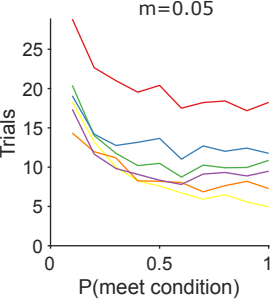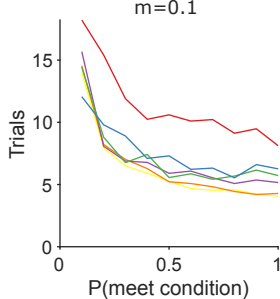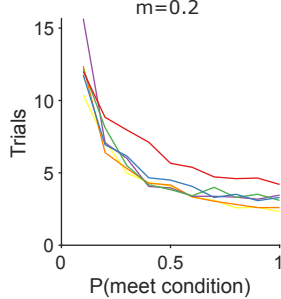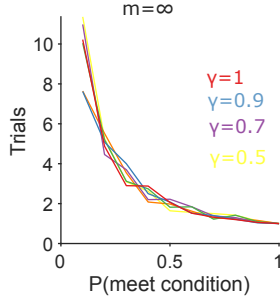

Supplement: supp [file elife_poa_e86491_Figure_2_figure_supplement_4.pdf › elife_poa_e86491_Figure_2_figure_supplement_4.pdf]

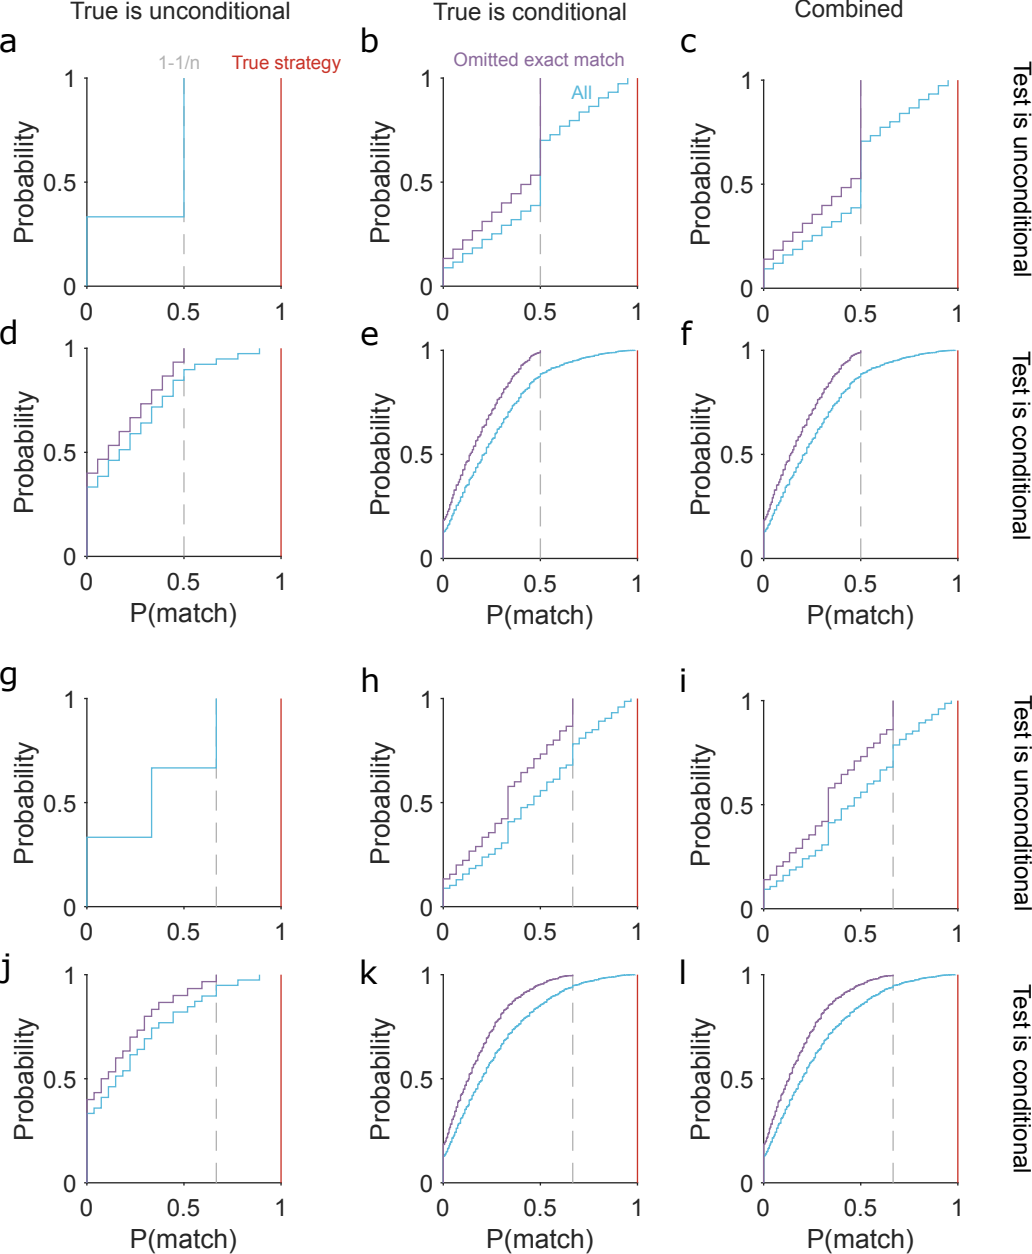

Supplement: supp [file elife_poa_e86491_Figure_2_figure_supplement_5.pdf › elife_poa_e86491_Figure_2_figure_supplement_5.pdf]

Y-maze

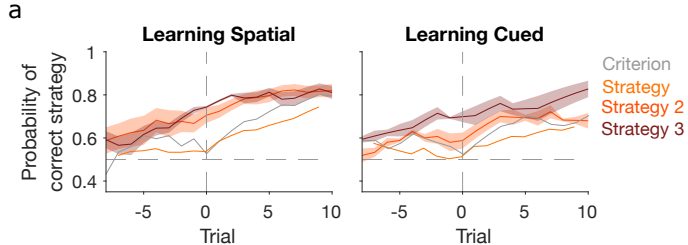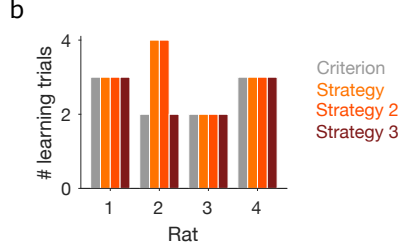

Lever press

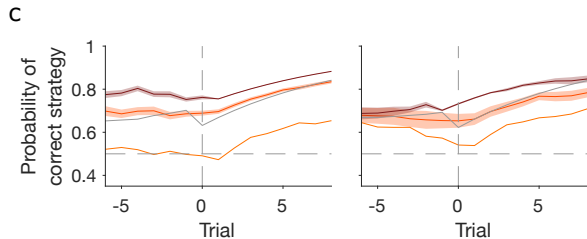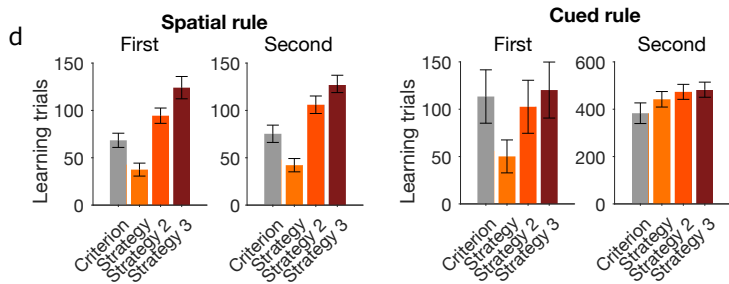

Supplement: supp [file elife_poa_e86491_Figure_3_figure_supplement_1.pdf › elife_poa_e86491_Figure_3_figure_supplement_1.pdf]

**a**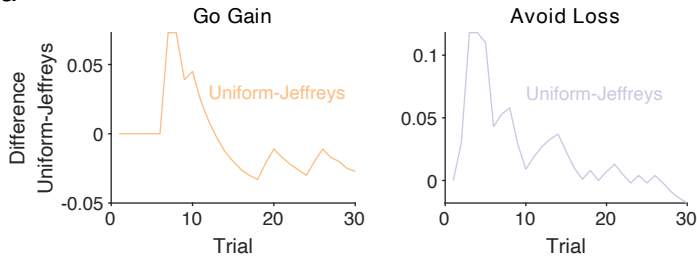**b**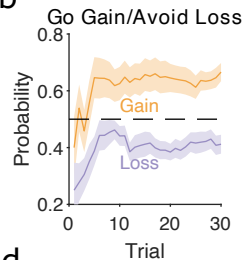**c**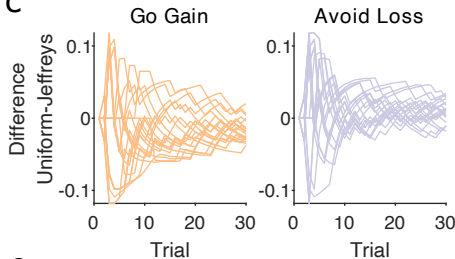**d**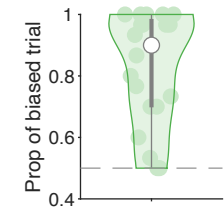**e**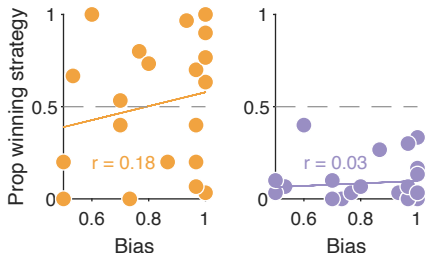

Supplement: supp [file elife_poa_e86491_Figure_6_fgure_supplement_1.pdf › elife_poa_e86491_Figure_6_fgure_supplement_1.pdf]
